# Supplementary material
Source: PubMed Central journal article supplement (PMC7735769)
Supplement: djaa040_supplementary_data.pdf [file djaa040_supplementary_data.pdf]

## SUPPLEMENTARY MATERIALS

### Description of Study Populations

*The Black Women's Health Study (BWHS)*: The BWHS is an ongoing prospective follow-up study of health and illness among US black women, with a focus on cancer.[1, 2] The study began in 1995 when 59,000 AA women 21–69 years of age from across the US completed a 14-page postal health questionnaire. Participants complete follow-up questionnaires every two years. Cases (affected) are women with incident invasive breast cancer. Controls (unaffected) were selected randomly from those who had not developed breast cancer and frequency-matched to cases on age at enrollment, most recent questionnaire completed, and geographic region of residence. Blood and saliva samples as a source of genomic DNA were obtained prior to breast cancer diagnosis for 70% of breast cancer cases and after diagnosis for the remainder.

*Cancer Prevention Study (CPS)-II Nutrition Cohort*: The CPS-II Nutrition Cohort is a prospective cohort study of 184,194 participants (97,786 women) recruited in 1992-1993 from 21 states.[3] Most participants were aged 50-74 years and self-reported white; 1% of participants were self-reported black. At the time of recruitment, participants completed a baseline demographic, lifestyle, and medical history questionnaire. Follow-up questionnaires were sent to cohort members every two years starting in 1997 to update exposure information and to ascertain newly diagnosed cancer outcomes. Self-reported cancers were verified through abstraction of medical records or linkage with state cancer registries. DNA for this study was extracted from blood specimens donated

by 21,963 female participants in 1998-2001 or from buccal cell samples from an additional 38,180 female participants in 2001-2002. For this study, we selected verified breast cancers in black women through 2013 and controls who were cancer-free at the time of the matched case's diagnosis and matched on age, race, and menopausal status. Samples were obtained prior to diagnosis of breast cancer for 72% of the 58 cases.

*Cancer Prevention Study (CPS)-3 Cohort:* The CPS-3 prospective cohort includes 303,682 participants (198,632 women) who were cancer-free, aged 30-65 years and lived in 35 states or Puerto Rico at the time of recruitment which occurred between 2006 and 2013.[4] Enrollment was conducted primarily at American Cancer Society community events or at community enrollment "drives". Nearly all women (96.9%) provided a blood specimen at the time of recruitment; these specimens were the source of DNA in this study. Most women self-described as non-Hispanic white (85.3%), while 4.1% were black, 6.5% Latina, and 4.1% other. The cohort receives follow-up surveys every three years starting in 2015. For this study, we selected all self-reported breast cancer cases on the 2015 survey and a randomly-selected subcohort of the larger cohort.

*California Teachers' Study (CTS):* The CTS is a prospective cohort study of 133,000 women who were residents of California and involved in the teaching professions at the time of enrollment in 1995.[5] Approximately 3,000 participants are African American. Follow-up surveys are conducted every five years and cancer cases are identified through the California Cancer Registry. Saliva and/or blood samples were obtained after occurrence of breast cancer for all 55 AA breast cancer cases included in this analysis.

Multiethnic Cohort Study (MEC): The MEC is a prospective cohort study, which enrolled 21,961 African American women from Los Angeles in 1993-1996. [6] Participants were 45-75 years of age at baseline. Follow-up data collection occurs through participant questionnaires and searches of the California Cancer Registry. Blood samples as a source of DNA were obtained during follow-up; samples were obtained prior to diagnosis for approximately 50% of the breast cancer cases.[6] Approximately two cancer-free participants per breast cancer case were included as controls in the present analysis.

Black Women: Etiology and Survival of Triple-negative Breast Cancers (BEST) Study: The BEST Study is a case-only study of early-onset breast cancer in Black women.[7] Black women diagnosed with invasive breast cancer at age  $\leq 50$  years between January 1, 2009 and December 31, 2012 and living in Florida at the time of their diagnosis were invited to enroll in the study. Cases were identified through the Florida State Cancer Registry. Saliva samples as a source of genomic DNA were collected at the time of enrollment.

The Northern California Breast Cancer Family Registry (NC-BCFR): The NC-BCFR is a population-based family study conducted in Northern California, and is one of six sites collaborating in the Breast Cancer Family Registry (BCFR), an international consortium funded by NCI. [8] African American breast cancer cases in NC-BCFR were diagnosed between January 1, 1995 and August 31, 2009; population controls were identified through random digit dialing conducted from 1999-2000. Cases with characteristics suggestive of inherited breast cancer were preferentially invited to enroll in the family registry; criteria included breast cancer diagnosis before age 35 years, prior ovarian or childhood cancer, bilateral breast cancer with a first diagnosis before age 50 years, or a first-degree family history of breast, ovarian, or childhood cancer. Cases who did not meet any of these criteria and were

diagnosed at age 35-64 years were randomly sampled and invited to enroll. Among cases included in the present analysis, 296 met high-risk criteria and 391 did not. Epidemiologic data and blood or mouthwash samples were collected at enrollment, usually within 12 months of diagnosis.

*UCI Breast Cancer Study (UCIBCS)*. The UCIBCS is a case-control study in which all cases were diagnosed in Orange County, California in 1995.[9] Controls were age-matched within 5 years of the age at diagnosis of cases. For the present study, 74 cases and 14 controls were included.

*Women's Circle of Health Study (WCHS)*: The WCHS is a case-control study of breast cancer initiated in four New York City boroughs and later expanded to ten counties of New Jersey.[10] Eligible cases were women with incident breast cancer diagnosed between 25 and 74 years of age; controls were identified through random-digit dialing and community health events. Blood or saliva samples as a source of genomic DNA were obtained at the time of enrollment, usually within one year of diagnosis.

*Wisconsin Women's Health Study (WWHS)*: The WWHS is a series of population-based control studies conducted in Wisconsin.[11] Data for this project were collected in 2001-2007; breast cancer cases aged 20-69 years were identified from the Wisconsin mandatory cancer registry and controls were randomly selected from lists of licensed drivers and frequency-matched by age group to cases. Participants were interviewed by telephone about one year after diagnosis for cases, or a similar reference date for controls. At the conclusion of the interview, women were invited to contribute self-collected saliva samples by mail for genotyping.

Sister Study. The Sister Study is a prospective cohort study of women who have a sister diagnosed with breast cancer.[12] The Sister Study began in July 2003, enrolling volunteers without a history of breast cancer themselves, aged 35-74, residing in the United States and Puerto Rico who had a sister with breast cancer. Enrollment of the cohort of 50,884 closed in March 2009. Baseline data collection included a comprehensive risk factor oriented Computer Assisted Telephone Interview; self-administered questionnaires on family medical history, early life exposures, diet, and personal care products; and a home visit for collecting biospecimens (first morning void urine, blood, toenail clippings, and household dust). Cases included African American women diagnosed during follow-up; controls were African American women in a random subcohort of all participants who did not develop breast cancer.

### Absolute risk estimation for breast cancer

Absolute risk is the probability that an individual with a measured set of risk factors (e.g. mutation status) and disease-free at age  $a$  will be diagnosed with the disease in the subsequent  $\tau$  years[13]. Let  $Z$  be the set of measured risk factors; in our calculations,  $Z$  is an indicator for carrying a pathogenic variant in a specified risk gene. We can express the absolute risk as

$$R(a, \tau, Z) = \int_a^{a+\tau} h_1(u|Z) \times \exp\left(-\int_a^u \{h_1(v|Z) + h_2(v|Z)\} dv\right) du$$

where  $h_1(a|Z)$  is the conditional breast-cancer hazard at age  $a$  and  $h_2(a|Z)$  is the hazard for competing risks (mortality) at age  $a$ . The breast-cancer hazard can be parameterized with a proportional hazards model as:

$$h_1(a|Z) = h_{10}(a)\exp(\beta Z)$$

where  $h_{10}(a)$  is the baseline hazard and  $\beta$  represents the breast-cancer relative risk for  $Z$ . Estimates for  $\beta$  can be estimated from the case-control data and the baseline hazards estimated by the following relationship between the baseline hazard and the marginal hazard

$$h_1^*(a) = h_{10}(a)E(\exp(\beta Z)) \approx \int h_{10}(a)\exp(\beta z)dF(z)$$

where  $F(Z)$  denotes the distribution of the risk factors in the population. For each age, we solve for  $h_{10}(a)$  by using the expected distribution of the risk factor in the population[14, 15]. We assume the risk factors,  $Z$ , are independent of the hazard for the competing events and directly use the baseline hazard.

For each of four genes, we estimated absolute risk of breast cancer for an African American who carried a pathogenic mutation in that gene. Odds ratio estimates from affected versus unaffected women were used as estimates for  $\beta$  and the 95% confidence intervals for the odds ratios were used to generate confidence bands for the absolute risk curves. SEER18 age-specific incidence rates[16] were used for estimation of the baseline hazard combined with the observed carrier frequency in the controls for the population frequency. The age-specific competing hazards model for all-cause mortality,  $h_2(a|Z)$ , was assumed to be independent of the pathogenic variant status—i.e.  $h_2(a|Z) = h_2(a)$ —and was estimated from CDC WONDER US mortality rates among African American women, subset to the same states as the SEER18 registries. Lifetime absolute risk curves were then estimated using the absolute risk equation above and computing the cumulative risk.

Supplementary Table 1. Contributing studies

| Study Acronym | Study Name                                           | Study design                                                                                          | Region of USA       | Mean age (SD) | % with first degree family hx of breast cancer |          |
|---------------|------------------------------------------------------|-------------------------------------------------------------------------------------------------------|---------------------|---------------|------------------------------------------------|----------|
|               |                                                      |                                                                                                       |                     |               | Cases                                          | Controls |
| BWHS          | Black Women's Health Study[1, 2]                     | Prospective cohort study: nested case-control                                                         | Nationwide          | 53.9 (10.7)   | 14.9                                           | 9.5      |
| CPSII         | Cancer Prevention Study-II Nutrition Cohort[3]       | Prospective cohort study: nested case-control                                                         | Nationwide          | 69.7 (7.6)    | 15.5                                           | 16.7     |
| CPS3          | Cancer Prevention Study-3[4]                         | Prospective cohort study: nested case-cohort                                                          | Nationwide          | 48.0 (10.1)   | 31.2                                           | 20.3     |
| CTS           | California Teachers Study[5]                         | Prospective cohort study: nested case-control                                                         | California          | 62.4 (9.9)    | 16.7                                           | 14.3     |
| MEC           | Multiethnic Cohort[6]                                | Prospective cohort study: nested case-control                                                         | California          | 67.1 (9.4)    | 19.1                                           | 12.0     |
| BEST          | Black Women: Etiology and Survival of TNBC[7]        | Case-only study with preferential selection at young age at diagnosis                                 | Florida             | 42.1 (6.1)    | 19.6                                           | --       |
| NC-BCFR       | Northern California Breast Cancer Family Registry[8] | Population-based case-cohort study and population controls, preferential selection of high-risk women | Northern California | 51.2 (8.8)    | 26.7                                           | 9.3      |
| UCIBCS        | UCI Breast Cancer Study[9]                           | Population-based case-control study with preferential selection at young age at diagnosis             | California          | 45.4 (9.7)    | 0                                              | 0        |
| WCHS          | Women's Circle of Health Study[10]                   | Population-based case control study                                                                   | NJ, NY              | 52.5 (10.6)   | 16.7                                           | 12.2     |
| WWHS          | Wisconsin Women's Health Study[11]                   | Population-based case-control study                                                                   | Wisconsin           | 54.0 (9.6)    | 18.9                                           | 16.1     |
| SISTER        | SISTER study[12]                                     | Prospective cohort of sisters of breast cancer patients: case-cohort                                  | Nationwide          | 55.4 (8.9)    | 100                                            | 100      |



Supplementary Table 2. Genes in the custom QIAseq panel evaluated for presence of mutations in AA women with breast cancer

| HGNC symbol   | RefSeq        | Ensemble Transcript Id | Chromosome name | Start position | End position | strand | Ensemble gene id |
|---------------|---------------|------------------------|-----------------|----------------|--------------|--------|------------------|
| <i>ATM</i>    | NM000051.3    | ENST00000278616        | 11              | 108093211      | 108239829    | 1      | ENSG00000149311  |
| <i>BARD1</i>  | NM000465.3    | ENST00000260947        | 2               | 215590370      | 215674428    | -1     | ENSG00000138376  |
| <i>BRCA1</i>  | NM007294.3    | ENST00000357654        | 17              | 41196312       | 41277500     | -1     | ENSG00000012048  |
| <i>BRCA2</i>  | NM000059.3    | ENST00000544455        | 13              | 32889611       | 32973805     | 1      | ENSG00000139618  |
| <i>BRIP1</i>  | NM032043.2    | ENST00000259008        | 17              | 59758627       | 59940882     | -1     | ENSG00000136492  |
| <i>CDH1</i>   | NM004360.4    | ENST00000261769        | 16              | 68771128       | 68869451     | 1      | ENSG00000039068  |
| <i>CDKN2A</i> | NM000077.4    | ENST00000304494        | 9               | 21967751       | 21995300     | -1     | ENSG00000147889  |
| <i>CHEK2</i>  | NM007194.3    | ENST00000328354        | 22              | 29083731       | 29138410     | -1     | ENSG00000183765  |
| <i>ERCC3</i>  | NM000122.1    | ENST00000285398        | 2               | 128014866      | 128051752    | -1     | ENSG00000163161  |
| <i>FANCC</i>  | NM000136.2    | ENST00000289081        | 9               | 97861336       | 98079991     | -1     | ENSG00000158169  |
| <i>FANCM</i>  | NM020937.3    | ENST00000267430        | 14              | 45605143       | 45670093     | 1      | ENSG00000187790  |
| <i>MLH1</i>   | NM000249.3    | ENST00000231790        | 3               | 37034823       | 37107380     | 1      | ENSG00000076242  |
| <i>MRE11A</i> | NM005591.3    | ENST00000323929        | 11              | 94152895       | 94227074     | -1     | ENSG00000020922  |
| <i>MSH2</i>   | NM000251.2    | ENST00000233146        | 2               | 47630108       | 47789450     | 1      | ENSG00000095002  |
| <i>MSH6</i>   | NM000179.2    | ENST00000234420        | 2               | 47922669       | 48037240     | 1      | ENSG00000116062  |
| <i>NBN</i>    | NM002485.4    | ENST00000265433        | 8               | 90945564       | 91015456     | -1     | ENSG00000104320  |
| <i>NF1</i>    | NM001042492.2 | ENST00000358273        | 17              | 29421945       | 29709134     | 1      | ENSG00000196712  |
| <i>PALB2</i>  | NM024675.3    | ENST00000261584        | 16              | 23614488       | 23652631     | -1     | ENSG00000083093  |
| <i>PTEN</i>   | NM000314.6    | ENST00000371953        | 10              | 89622870       | 89731687     | 1      | ENSG00000171862  |
| <i>RAD51C</i> | NM058216.2    | ENST00000337432        | 17              | 56769934       | 56811703     | 1      | ENSG00000108384  |
| <i>RAD51D</i> | NM001142571   | ENST00000345365        | 17              | 33426811       | 33448541     | -1     | ENSG00000185379  |
| <i>RECQL</i>  | NM002907      | ENST00000444129        | 12              | 21621845       | 21654603     | -1     | ENSG00000004700  |
| <i>TP53</i>   | NM000546.5    | ENST00000269305        | 17              | 7565097        | 7590856      | -1     | ENSG00000141510  |

Supplementary Table 3. Allele count (AC) of pathogenic mutations in African American women with breast cancer (affected) and unaffected African American women

| Gene with pathogenic variants | Affected | Unaffected | Total |
|-------------------------------|----------|------------|-------|
| <i>ATM</i>                    | 41       | 16         | 57    |
| c.1017delT                    | 1        | 1          | 2     |
| c.1208C>A_p.Ser403X           | 3        | —          | 3     |
| c.1339C>T_p.Arg447X           | —        | 1          | 1     |
| c.1464G>A_p.Trp488X           | 1        | —          | 1     |
| c.1564_1565delGA              | 1        | —          | 1     |
| c.1915_1916insT               | 1        | 1          | 2     |
| c.2023C>T_p.Gln675X           | —        | 1          | 1     |
| c.2062G>T_p.Glu688X           | 1        | —          | 1     |
| c.2124+1G>A                   | 1        | —          | 1     |
| c.2250G>A_p.=                 | 1        | —          | 1     |
| c.2806_2809dupCTAG            | —        | 1          | 1     |
| c.289delA                     | 1        | —          | 1     |
| c.2921+1G>A                   | 1        | —          | 1     |
| c.3049C>T_p.Gln1017X          | 1        | 1          | 2     |
| c.3078-1G>A                   | 1        | —          | 1     |
| c.3372C>G_p.Tyr1124X          | 1        | —          | 1     |
| c.3539_3540delTG              | 1        | —          | 1     |
| c.3865A>T_p.Lys1289X          | 1        | —          | 1     |
| c.3G>A_p.Met1?                | —        | 1          | 1     |
| c.4358delT                    | 1        | —          | 1     |
| c.4804_4805delGT              | 1        | —          | 1     |
| c.5118_5121delAGAA            | 1        | —          | 1     |
| c.5798G>A_p.Trp1933X          | 1        | 1          | 2     |
| c.5890A>T_p.Lys1964X          | 1        | —          | 1     |
| c.680C>G_p.Ser227X            | —        | 1          | 1     |
| c.6813_6814delGinsCA          | 1        | —          | 1     |

|                        |           |          |           |
|------------------------|-----------|----------|-----------|
| c.6829delC             | 1         | —        | 1         |
| c.7000_7003delTACA     | 1         | 1        | 2         |
| c.72+1G>A              | 1         | —        | 1         |
| c.7220C>A_p.Ser2407X   | 1         | —        | 1         |
| c.7271T>G_p.Val2424Gly | 1         | —        | 1         |
| c.742C>T_p.Arg248X     | 1         | —        | 1         |
| c.748C>T_p.Arg250X     | 1         | 2        | 3         |
| c.7671_7674delGTTT     | —         | 1        | 1         |
| c.7913G>A_p.Trp2638X   | 5         | 1        | 6         |
| c.7998dupT             | 1         | —        | 1         |
| c.8545C>T_p.Arg2849X   | —         | 1        | 1         |
| c.8725A>T_p.Arg2909X   | 1         | —        | 1         |
| c.8835_8836delGT       | —         | 1        | 1         |
| c.902-1G>A             | 1         | —        | 1         |
| c.9139C>T_p.Arg3047X   | 3         | —        | 3         |
| <b>BARD1</b>           | <b>7</b>  | <b>8</b> | <b>15</b> |
| c.1023delG             | 1         | —        | 1         |
| c.1061C>G_p.Ser354X    | 1         | —        | 1         |
| c.1270delA             | 2         | 1        | 3         |
| c.1385G>A_p.Trp462X    | 1         | 1        | 2         |
| c.1652C>G_p.Ser551X    | 1         | —        | 1         |
| c.188T>G_p.Leu63X      | 1         | —        | 1         |
| c.1921C>T_p.Arg641X    | —         | 4        | 4         |
| c.334C>T_p.Arg112X     | —         | 2        | 2         |
| <b>BRCA1</b>           | <b>90</b> | <b>3</b> | <b>93</b> |
| c.1386delG             | —         | 1        | 1         |
| c.1636_1654del19       | 1         | —        | 1         |
| c.182G>A_p.Cys61Tyr    | 1         | —        | 1         |
| c.190T>G_p.Cys64Gly    | 1         | —        | 1         |
| c.2071delA             | 1         | —        | 1         |

|                        |   |   |   |
|------------------------|---|---|---|
| c.213-11T>G            | 1 | — | 1 |
| c.2740G>T_p.Glu914X    | 3 | — | 3 |
| c.2880dupC             | 1 | — | 1 |
| c.3016delC             | 1 | — | 1 |
| c.3358_3359delGT       | 1 | — | 1 |
| c.3481_3491del11       | 1 | — | 1 |
| c.3598C>T_p.Gln1200X   | — | 1 | 1 |
| c.3748G>T_p.Glu1250X   | 1 | — | 1 |
| c.3756_3759delGTCT     | 3 | — | 3 |
| c.391A>T_p.Arg131X     | 1 | — | 1 |
| c.3G>T_p.Met1?         | 1 | — | 1 |
| c.4041_4042delAG       | 1 | — | 1 |
| c.4065_4068delTCAA     | 1 | — | 1 |
| c.4163_4166delAGAG     | 1 | — | 1 |
| c.4327C>T_p.Arg1443X   | 2 | — | 2 |
| c.4357+1G>A            | 9 | — | 9 |
| c.4389C>A_p.Tyr1463X   | 2 | — | 2 |
| c.4408G>T_p.Glu1470X   | 1 | — | 1 |
| c.4484G>T_p.Arg1495Met | 3 | — | 3 |
| c.4603G>T_p.Glu1535X   | 1 | — | 1 |
| c.4668dupA             | 1 | — | 1 |
| c.4986+6T>C            | 5 | — | 5 |
| c.5152+1G>A            | 1 | — | 1 |
| c.5165C>T_p.Ser1722Phe | 1 | — | 1 |
| c.5177_5180delGAAA     | 8 | — | 8 |
| c.5251C>T_p.Arg1751X   | 4 | — | 4 |
| c.5278-1G>C            | 1 | — | 1 |
| c.5324T>G_p.Met1775Arg | 7 | — | 7 |
| c.5387C>A_p.Ser1796X   | 4 | — | 4 |
| c.5467+1G>A            | 3 | — | 3 |

|                      |     |    |     |
|----------------------|-----|----|-----|
| c.5562_5563insGG     | 1   | —  | 1   |
| c.68_69delAG         | 1   | —  | 1   |
| c.815_824dup10       | 11  | 1  | 12  |
| c.981_982delAT       | 1   | —  | 1   |
| del exon 13-15       | 2   | —  | 2   |
| <i>BRCA2</i>         | 107 | 12 | 119 |
| c.1103C>G_p.Ser368X  | 1   | —  | 1   |
| c.115delG            | 1   | —  | 1   |
| c.1310_1313delAAGA   | 6   | —  | 6   |
| c.1570_1571delAT     | 1   | —  | 1   |
| c.1705_1706delCA     | 1   | —  | 1   |
| c.1796_1800del5      | 2   | —  | 2   |
| c.1800T>A_p.Tyr600X  | 2   | —  | 2   |
| c.1887_1893del7      | 2   | —  | 2   |
| c.2092delC           | 1   | —  | 1   |
| c.2099T>A_p.Leu700X  | 1   | —  | 1   |
| c.2564_2565delCA     | 1   | —  | 1   |
| c.2808_2811delACAA   | 2   | —  | 2   |
| c.2808delA           | —   | 2  | 2   |
| c.2830A>T_p.Lys944X  | 1   | —  | 1   |
| c.2957_2958insG      | 1   | —  | 1   |
| c.3009_3010delCA     | 1   | —  | 1   |
| c.3450dupT           | 1   | —  | 1   |
| c.3599_3600delGT     | 1   | —  | 1   |
| c.3680_3681delTG     | 3   | 2  | 5   |
| c.3847_3848delGT     | 1   | —  | 1   |
| c.3860_3863delATAA   | 1   | —  | 1   |
| c.3922G>T_p.Glu1308X | 1   | —  | 1   |
| c.4211delC           | 1   | —  | 1   |
| c.4456_4459delGTTA   | 1   | —  | 1   |

|                          |   |   |   |
|--------------------------|---|---|---|
| c.4471_4474delCTGA       | 2 | — | 2 |
| c.4477_4478delGA         | 2 | — | 2 |
| c.4552delG               | 1 | — | 1 |
| c.4712_4713delAG         | 1 | — | 1 |
| c.476-4_476-1delCCAGinsT | 1 | — | 1 |
| c.489_490insG            | 1 | — | 1 |
| c.4912A>T_p.Lys1638X     | 1 | — | 1 |
| c.4936_4939delGAAA       | 3 | — | 3 |
| c.4965C>G_p.Tyr1655X     | 1 | — | 1 |
| c.5073dupA               | 2 | — | 2 |
| c.517-2A>G               | 1 | — | 1 |
| c.518delG                | 1 | — | 1 |
| c.5350_5351delAA         | 2 | 1 | 3 |
| c.5351dupA               | 2 | — | 2 |
| c.5576_5579delTTAA       | 1 | — | 1 |
| c.5616_5620del5          | 4 | 1 | 5 |
| c.5621_5624delTTAA       | 2 | — | 2 |
| c.5946delT               | 1 | — | 1 |
| c.5979dupA               | 1 | — | 1 |
| c.6124C>T_p.Gln2042X     | 1 | — | 1 |
| c.6137C>A_p.Ser2046X     | 1 | — | 1 |
| c.6468_6469delTC         | 1 | — | 1 |
| c.6486_6489delACAA       | 1 | — | 1 |
| c.658_659delGT           | — | 1 | 1 |
| c.6600_6601delTT         | 1 | — | 1 |
| c.6611delC               | 1 | — | 1 |
| c.67+2T>G                | — | 1 | 1 |
| c.6938-1G>A              | — | 1 | 1 |
| c.7024C>T_p.Gln2342X     | 2 | — | 2 |
| c.7115C>A_p.Ser2372X     | 1 | — | 1 |

|                        |    |   |    |
|------------------------|----|---|----|
| c.7115C>G_p.Ser2372X   | 1  | — | 1  |
| c.71delT               | 1  | — | 1  |
| c.7208_7211delCCAA     | 2  | — | 2  |
| c.7480C>T_p.Arg2494X   | 1  | — | 1  |
| c.7485dupT             | —  | 1 | 1  |
| c.7543dupA             | 1  | — | 1  |
| c.7558C>T_p.Arg2520X   | 3  | 1 | 4  |
| c.7757G>A_p.Trp2586X   | 1  | — | 1  |
| c.7805+1G>A            | 1  | — | 1  |
| c.793+1G>A             | 1  | — | 1  |
| c.8009C>T_p.Ser2670Leu | —  | 1 | 1  |
| c.8777T>A_p.Leu2926X   | 2  | — | 2  |
| c.8817_8820delGAAA     | 1  | — | 1  |
| c.8969G>A_p.Trp2990X   | 2  | — | 2  |
| c.9041C>G_p.Ser3014X   | 2  | — | 2  |
| c.9253dupA             | 6  | — | 6  |
| c.9294C>G_p.Tyr3098X   | 1  | — | 1  |
| c.9329dupA             | 1  | — | 1  |
| c.9382C>T_p.Arg3128X   | 5  | — | 5  |
| c.9435_9436delGT       | 1  | — | 1  |
| c.9924C>G_p.Tyr3308X   | 1  | — | 1  |
| <i>BRIP1</i>           | 10 | 6 | 16 |
| c.1045G>C_p.Ala349Pro  | 3  | 1 | 4  |
| c.112dupA              | 1  | — | 1  |
| c.1156A>T_p.Lys386X    | —  | 1 | 1  |
| c.1162C>T_p.Gln388X    | 1  | — | 1  |
| c.141delC              | —  | 1 | 1  |
| c.1430T>G_p.Leu477X    | —  | 1 | 1  |
| c.1871C>A_p.Ser624X    | 1  | — | 1  |
| c.1936-2A>G            | 1  | — | 1  |

|                     |    |    |    |
|---------------------|----|----|----|
| c.2038_2039dupTT    | —  | 1  | 1  |
| c.2114_2118del5     | 1  | —  | 1  |
| c.2392C>T_p.Arg798X | 1  | —  | 1  |
| c.376C>T_p.Gln126X  | 1  | —  | 1  |
| c.622C>T_p.Gln208X  | —  | 1  | 1  |
| <i>CDH1</i>         | 4  | 2  | 6  |
| c.1137+1G>A         | 1  | —  | 1  |
| c.187C>T_p.Arg63X   | —  | 1  | 1  |
| c.1979dupT          | 1  | 1  | 2  |
| c.454C>T_p.Gln152X  | 1  | —  | 1  |
| c.532-1G>C          | 1  | —  | 1  |
| <i>CDKN2A</i>       | 1  | —  | 1  |
| c.159G>C_p.Met53Ile | 1  | —  | 1  |
| <i>CHEK2</i>        | 19 | 6  | 25 |
| c.1011C>A_p.Tyr337X | —  | 1  | 1  |
| c.1100delC          | 9  | 2  | 11 |
| c.1116dupC          | 5  | —  | 5  |
| c.1139_1140delTC    | 1  | —  | 1  |
| c.1263delT          | 1  | —  | 1  |
| c.1462-1G>A         | 1  | —  | 1  |
| c.1502_1503dupAG    | 1  | —  | 1  |
| c.339C>G_p.Tyr113X  | —  | 2  | 2  |
| c.684-1G>C          | —  | 1  | 1  |
| c.847-1G>A          | 1  | —  | 1  |
| <i>ERCC3</i>        | 14 | 11 | 25 |
| c.1354C>T_p.Arg452X | 6  | 6  | 12 |
| c.1678_1679delGT    | 1  | —  | 1  |
| c.1720C>T_p.Arg574X | 2  | 1  | 3  |
| c.1725delG          | 1  | —  | 1  |
| c.1735delT          | 1  | —  | 1  |



|                          |    |    |    |
|--------------------------|----|----|----|
| c.1757_1758delAG         | 1  | —  | 1  |
| c.1757delA               | —  | 1  | 1  |
| c.1828-2A>G              | —  | 1  | 1  |
| c.1841C>A_p.Ser614X      | —  | 1  | 1  |
| c.235-1G>A               | —  | 1  | 1  |
| c.657+1G>A               | 1  | —  | 1  |
| c.700C>T_p.Arg234X       | 1  | —  | 1  |
| <i>FANCC</i>             | 22 | 10 | 32 |
| c.1043_1044delTT         | 1  | —  | 1  |
| c.1417C>T_p.Gln473X      | 1  | —  | 1  |
| c.1642C>T_p.Arg548X      | 2  | —  | 2  |
| c.319C>T_p.Gln107X       | —  | 1  | 1  |
| c.355_360delTCTCATinsA   | 13 | 7  | 20 |
| c.45G>A_p.Trp15X         | 2  | —  | 2  |
| c.520C>T_p.Arg174X       | 1  | —  | 1  |
| c.553C>T_p.Arg185X       | 1  | 2  | 3  |
| del exon 5-7             | 1  | —  | 1  |
| <i>FANCM</i>             | 13 | 11 | 24 |
| c.1213C>T_p.Arg405X      | —  | 1  | 1  |
| c.1362_1363insCAAAGTTAAA | 1  | —  | 1  |
| c.1506_1507insTA         | —  | 2  | 2  |
| c.1777C>T_p.Arg593X      | —  | 1  | 1  |
| c.1879C>T_p.Arg627X      | —  | 1  | 1  |
| c.1972C>T_p.Arg658X      | 2  | —  | 2  |
| c.2003-1G>A              | 1  | —  | 1  |
| c.2465_2469del5          | —  | —  | —  |
| c.2586_2589delAAAA       | —  | 1  | 1  |
| c.3088C>T_p.Arg1030X     | 1  | —  | 1  |
| c.3146T>A_p.Leu1049X     | —  | 1  | 1  |
| c.3628C>T_p.Gln1210X     | 2  | —  | 2  |

|                        |   |    |    |
|------------------------|---|----|----|
| c.3732_3735dupAATA     | 1 | —  | 1  |
| c.3985delT             | 1 | —  | 1  |
| c.428_430delCGAinsGT   | 1 | —  | 1  |
| c.4317+1G>A            | — | 1  | 1  |
| c.4504_4505delAG       | 1 | —  | 1  |
| c.473dupT              | 1 | —  | 1  |
| c.4812delT             | — | 2  | 2  |
| c.919-1G>C             | — | 1  | 1  |
| del exon 7-11          | 1 | —  | 1  |
| <i>MLH1</i>            | — | 1  | 1  |
| c.1517T>C_p.Val506Ala  | — | 1  | 1  |
| <i>MRE11A</i>          | 2 | 3  | 5  |
| c.1015A>T_p.Lys339X    | 2 | 1  | 3  |
| c.1714C>T_p.Arg572X    | — | 1  | 1  |
| c.1771C>T_p.Gln591X    | — | 1  | 1  |
| <i>MSH6</i>            | 4 | 3  | 7  |
| c.3226C>T_p.Arg1076Cys | 1 | —  | 1  |
| c.3557-1G>A            | 1 | —  | 1  |
| c.3739delA             | — | 1  | 1  |
| c.3934_3937dupGTTA     | 1 | —  | 1  |
| c.3991C>T_p.Arg1331X   | — | 1  | 1  |
| c.741delA              | — | 1  | 1  |
| c.973C>T_p.Gln325X     | 1 | —  | 1  |
| <i>NBN</i>             | 8 | 10 | 18 |
| c.1154_1155delAA       | 1 | —  | 1  |
| c.11delT               | — | 2  | 2  |
| c.1255_1258delAATA     | — | 1  | 1  |
| c.127C>T_p.Arg43X      | 2 | —  | 2  |
| c.1484delC             | — | 1  | 1  |
| c.1741C>T_p.Gln581X    | 1 | —  | 1  |

|                        |    |   |    |
|------------------------|----|---|----|
| c.535_537delTTCinsAA   | —  | 1 | 1  |
| c.580G>T_p.Glu194X     | —  | 1 | 1  |
| c.657_661del5          | —  | 2 | 2  |
| c.698_701delAACA       | 1  | — | 1  |
| c.808_809delGT         | 1  | — | 1  |
| c.83_89del7            | —  | 1 | 1  |
| c.897-2A>T             | 2  | 1 | 3  |
| <i>NF1</i>             | 6  | 1 | 7  |
| c.2033delC             | 1  | — | 1  |
| c.4333-2A>G            | 1  | — | 1  |
| c.5488C>T_p.Arg1830Cys | 1  | — | 1  |
| c.6004C>T_p.Gln2002X   | 1  | — | 1  |
| c.611dupT              | —  | 1 | 1  |
| c.663G>A_p.Trp221X     | 1  | — | 1  |
| c.7115delA             | 1  | — | 1  |
| <i>PALB2</i>           | 57 | 5 | 62 |
| c.1039G>T_p.Glu347X    | —  | 1 | 1  |
| c.12dupT               | 1  | — | 1  |
| c.1479delC             | 1  | — | 1  |
| c.1490delA             | 1  | — | 1  |
| c.156delA              | 1  | — | 1  |
| c.1633G>T_p.Glu545X    | 2  | — | 2  |
| c.172_175delTTGT       | 3  | 1 | 4  |
| c.196C>T_p.Gln66X      | 1  | — | 1  |
| c.1972delG             | 1  | — | 1  |
| c.2120delC             | 1  | — | 1  |
| c.212-2A>G             | 1  | — | 1  |
| c.2167_2168delAT       | 1  | — | 1  |
| c.226delA              | 3  | — | 3  |
| c.2386G>T_p.Gly796X    | 2  | — | 2  |

|                      |   |   |    |
|----------------------|---|---|----|
| c.2674G>T_p.Glu892X  | 1 | — | 1  |
| c.2730T>A_p.Tyr910X  | 1 | — | 1  |
| c.2835-1G>C          | 1 | — | 1  |
| c.2878delC           | 2 | — | 2  |
| c.2888delC           | 1 | — | 1  |
| c.2938delA           | — | 1 | 1  |
| c.3048delT           | 1 | — | 1  |
| c.3058C>T_p.Gln1020X | 1 | — | 1  |
| c.3113G>A_p.Trp1038X | 2 | — | 2  |
| c.3116delA           | 2 | — | 2  |
| c.3323delA           | 9 | 1 | 10 |
| c.347T>A_p.Leu116X   | 1 | — | 1  |
| c.3549C>G_p.Tyr1183X | 2 | — | 2  |
| c.451C>T_p.Gln151X   | 1 | — | 1  |
| c.519delG            | 1 | — | 1  |
| c.527_531del5        | 1 | — | 1  |
| c.758dupT            | 1 | — | 1  |
| c.79G>T_p.Glu27X     | 4 | — | 4  |
| c.844_847delAGAT     | 1 | — | 1  |
| del exon 1-10        | 1 | — | 1  |
| del exon 1-6         | 1 | — | 1  |
| del exon 8-13        | 1 | — | 1  |
| (blank)              | 2 | 1 | 3  |
| <i>RAD51C</i>        | 9 | 3 | 12 |
| c.186_187delAA       | — | 1 | 1  |
| c.405-1G>C           | 2 | — | 2  |
| c.472dupA            | 1 | — | 1  |
| c.535delC            | 1 | — | 1  |
| c.625_628delTATT     | — | 1 | 1  |
| c.630T>G_p.Tyr210X   | 1 | — | 1  |

|                      |            |            |            |
|----------------------|------------|------------|------------|
| c.904+5G>T           | 1          | —          | 1          |
| c.914G>A_p.Trp305X   | 2          | —          | 2          |
| c.97C>T_p.Gln33X     | 1          | 1          | 2          |
| <i>RAD51D</i>        | 8          | 2          | 10         |
| c.326dupC            | 3          | 1          | 4          |
| c.461_462insTT       | —          | 1          | 1          |
| c.473_480+1del9      | 1          | —          | 1          |
| c.739-1G>A           | 1          | —          | 1          |
| del exon 7-10        | 2          | —          | 2          |
| del exon 9-10        | 1          | —          | 1          |
| <i>RECQL</i>         | 17         | 5          | 22         |
| c.1194T>A_p.Tyr398X  | 1          | —          | 1          |
| c.1267dupA           | 1          | —          | 1          |
| c.1353_1355+1delCAAG | —          | 3          | 3          |
| c.1461_1462delGA     | 2          | —          | 2          |
| c.1489dupA           | 5          | 1          | 6          |
| c.1667_1667+3delAGTA | 3          | —          | 3          |
| c.1756_1759dupATTA   | —          | 1          | 1          |
| c.1870C>T_p.Gln624X  | 1          | —          | 1          |
| c.427_428delCT       | 1          | —          | 1          |
| c.950-2A>C           | 1          | —          | 1          |
| c.962_965delGTTT     | 2          | —          | 2          |
| <i>TP53</i>          | 5          | 1          | 6          |
| c.375+1G>A           | —          | 1          | 1          |
| c.473G>A_p.Arg158His | 1          | —          | 1          |
| c.714T>A_p.Cys238X   | 1          | —          | 1          |
| c.743G>A_p.Arg248Gln | 2          | —          | 2          |
| c.818G>A_p.Arg273His | 1          | —          | 1          |
| <b>Grand Total</b>   | <b>444</b> | <b>119</b> | <b>563</b> |

Supplementary Table 4. Frequency of pathogenic mutations in known or suspected breast cancer susceptibility genes and associations with breast cancer risk in African American women from population-based\* studies, with adjustment for individual study

| Gene          | Affected (N=3916)      |                        | Unaffected (N=4925)    |                         | Odds ratio†<br>(95% CI) | p value‡ |
|---------------|------------------------|------------------------|------------------------|-------------------------|-------------------------|----------|
|               | Mutated alleles<br>No. | Mutation<br>frequency% | Mutated alleles<br>No. | Mutation<br>frequency % |                         |          |
| <i>ATM</i>    | 28                     | 0.72                   | 16                     | 0.33                    | 1.72 (0.92-3.32)        | 0.096    |
| <i>BARD1</i>  | 7                      | 0.18                   | 8                      | 0.16                    | 0.94 (0.32-2.71)        | 0.91     |
| <i>BRCA1</i>  | 41                     | 1.05                   | 1                      | 0.02                    | 39.92 (8.60-710)        | <0.001   |
| <i>BRCA2</i>  | 72                     | 1.84                   | 12                     | 0.24                    | 8.24 (4.54-16.37)       | <0.001   |
| <i>BRIP1</i>  | 6                      | 0.15                   | 6                      | 0.12                    | 1.08 (0.32-3.65)        | 0.89     |
| <i>CHEK2</i>  | 15                     | 0.38                   | 6                      | 0.12                    | 3.42 (1.33-10.00)       | 0.015    |
| <i>ERCC3</i>  | 13                     | 0.33                   | 9                      | 0.18                    | 2.51 (1.06-6.20)        | 0.038    |
| <i>FANCC</i>  | 16                     | 0.41                   | 10                     | 0.20                    | 2.40 (1.08-5.61)        | 0.035    |
| <i>FANCM</i>  | 11                     | 0.28                   | 11                     | 0.22                    | 1.08 (0.45-2.63)        | 0.86     |
| <i>NBN</i>    | 4                      | 0.10                   | 9                      | 0.18                    | 0.50 (0.13-1.61)        | 0.27     |
| <i>PALB2</i>  | 39                     | 1.00                   | 5                      | 0.10                    | 8.12 (3.43-23.91)       | <0.001   |
| <i>RAD51C</i> | 7                      | 0.18                   | 3                      | 0.06                    | 2.75 (0.75-12.94)       | 0.15     |
| <i>RAD51D</i> | 6                      | 0.15                   | 2                      | 0.04                    | 4.09 (0.87-29.78)       | 0.10     |
| <i>RECQL</i>  | 12                     | 0.31                   | 5                      | 0.10                    | 3.02 (1.07-9.82)        | 0.046    |
| Total         | 277                    | 7.07                   | 103                    | 2.09                    |                         |          |

\*Studies that did not preferentially enroll cases based on family history or age; included were BWHS, CPSII, CPS3, CTS, MEC, WCHS, WWHS

†Odds ratios adjusted for study, age, and first-degree family history of breast cancer. Reference group is women who have no mutations in the given gene.

‡Two-sided p-value from logistic regression analysis

Supplementary Table 5. Associations between pathogenic mutations in breast cancer susceptibility genes and triple negative breast cancer risk

| Women with triple negative breast cancer (N=654) |                     |                      |                   |          |
|--------------------------------------------------|---------------------|----------------------|-------------------|----------|
| Gene                                             | Mutated alleles No. | Mutation frequency % | OR (95% CI)*      | p value† |
| <i>ATM</i>                                       | 0                   | -                    |                   |          |
| <i>BARD1</i>                                     | 3                   | 0.45                 |                   |          |
| <i>BRCA1</i>                                     | 43                  | 6.57                 | 180 (37.9 - 3238) | <0.001   |
| <i>BRCA2</i>                                     | 13                  | 1.99                 | 6.23 (2.65-14.84) | <0.001   |
| <i>BRIP1</i>                                     | 2                   | 0.22                 |                   |          |
| <i>CDH1</i>                                      | 1                   | 0.15                 |                   |          |
| <i>CHEK2</i>                                     | 1                   | 0.15                 |                   |          |
| <i>ERCC3</i>                                     | 1                   | 0.15                 |                   |          |
| <i>FANCC</i>                                     | 2                   | 0.30                 |                   |          |
| <i>NF1</i>                                       | 2                   | 0.30                 |                   |          |
| <i>PALB2</i>                                     | 14                  | 2.14                 | 23.5 (8.35-76.71) | <0.001   |
| <i>RAD51C</i>                                    | 2                   | 0.30                 |                   |          |
| <i>RAD51D</i>                                    | 1                   | 0.15                 |                   |          |
| <i>RECQL</i>                                     | 3                   | 0.45                 |                   |          |
| <i>TP53</i>                                      | 0                   | -                    |                   |          |

\*Odd ratios adjusted for study design, age, and first-degree family history of breast cancer. Reference group is women who have no mutations in the given gene.

† Two-sided p-value from logistic regression analysis

Supplementary Table 6. Enrichment of pathogenic susceptibility gene mutations in ER-positive relative to ER-negative breast cancer

|               | OR (95% CI)*      | p value† |
|---------------|-------------------|----------|
| <i>ATM</i>    | 1.94 (0.85-5.22)  | 0.14     |
| <i>BARD1</i>  | 0.45 (0.083-2.46) | 0.33     |
| <i>BRCA1</i>  | 0.14 (0.080-0.24) | < 0.001  |
| <i>BRCA2</i>  | 0.84 (0.54-1.32)  | 0.44     |
| <i>BRIP1</i>  | 0.57 (0.13-2.93)  | 0.47     |
| <i>CHEK2</i>  | 2.98 (0.83-19.01) | 0.15     |
| <i>ERCC3</i>  | 1.50 (0.45-6.75)  | 0.54     |
| <i>FANCC</i>  | 1.16 (0.43-3.66)  | 0.78     |
| <i>PALB2</i>  | 0.40 (0.22-0.74)  | 0.0030   |
| <i>RAD51C</i> | 0.45 (0.10-1.93)  | 0.26     |
| <i>RAD51D</i> | 0.13 (0.019-0.59) | 0.015    |
| <i>RECQL</i>  | 0.82 (0.25-3.09)  | 0.74     |

\*Adjusted for study design, age and first-degree family history of breast cancer.

Reference group is women who have no mutations in the given gene.

†Two-sided p-value from logistic regression analysis



Supplementary Table 7. Comparisons of pathogenic mutations in breast cancer susceptibility genes in African American affected and unaffected women with pathogenic mutations in gnomAD AFR reference unaffected women

| Gene          | Affected |       | Unaffected |      | gnomAD AFR |       | Affected vs. gnomAD     |          | Unaffected vs. gnomAD   |          |
|---------------|----------|-------|------------|------|------------|-------|-------------------------|----------|-------------------------|----------|
|               | AC*      | AN*   | AC         | AN   | AC         | AN    | Odds ratio*<br>(95% CI) | p-value† | Odds ratio*<br>(95% CI) | p-value† |
| <i>ATM</i>    | 39       | 10108 | 16         | 9986 | 18         | 15277 | 3.28 (1.87-5.79)        | <0.001   | 1.36 (0.68-2.69)        | 0.38     |
| <i>BARD1</i>  | 7        | 10108 | 8          | 9986 | 7          | 15030 | 1.49 (0.46-4.76)        | 0.59     | 1.72 (0.63-5.27)        | 0.30     |
| <i>BRCA1</i>  | 79       | 10108 | 1          | 9986 | 9          | 15287 | 13.4 (6.66-27.5)        | <0.001   | 0.17 (0.01-1.23)        | 0.10     |
| <i>BRCA2</i>  | 98       | 10108 | 12         | 9986 | 20         | 15188 | 7.42 (4.56-12.44)       | <0.001   | 0.91 (0.42-1.89)        | 0.86     |
| <i>BRIP1</i>  | 9        | 10108 | 6          | 9986 | 17         | 15279 | 0.80 (0.42-3.95)        | 0.69     | 0.54 (0.21-1.40)        | 0.21     |
| <i>CDH1</i>   | 4        | 10108 | 2          | 9986 | 1          | 14947 | —                       | —        | —                       | —        |
| <i>CHEK2</i>  | 19       | 10108 | 6          | 9986 | 10         | 14912 | 2.81 (1.28-6.56)        | 0.0074   | 0.90 (0.32-2.53)        | 0.90     |
| <i>ERCC3</i>  | 14       | 10108 | 9          | 9986 | 9          | 15290 | 2.36 (0.96-5.61)        | 0.053    | 1.53 (0.57-4.12)        | 0.47     |
| <i>FANCC</i>  | 21       | 10108 | 10         | 9986 | 12         | 15256 | 2.65 (1.25-5.73)        | 0.0069   | 1.27 (0.54-2.99)        | 0.66     |
| <i>NF1</i>    | 6        | 10108 | 1          | 9986 | 4          | 15240 | 2.26 (0.62-8.55)        | 0.21     | —                       | —        |
| <i>PALB2</i>  | 49       | 10108 | 4          | 9986 | 15         | 15282 | 4.96 (2.80-8.95)        | <0.001   | 0.41 (0.12-1.23)        | 0.16     |
| <i>PTEN</i>   | 0        | 10108 | 0          | 9986 | 1          | 15159 | —                       | —        | —                       | —        |
| <i>RAD51C</i> | 9        | 10108 | 3          | 9986 | 2          | 15268 | 6.80 (1.51-43.86)       | 0.0095   | 2.29 (0.36-18.48)       | 0.39     |
| <i>RAD51D</i> | 5        | 10108 | 2          | 9986 | 2          | 15227 | 3.77 (0.78-26.73)       | 0.12     | —                       | —        |
| <i>RECQL</i>  | 16       | 10108 | 5          | 9986 | 12         | 15037 | 1.99 (0.91-4.29)        | 0.082    | 0.63 (0.21-1.80)        | 0.46     |
| <i>TP53</i>   | 5        | 10108 | 1          | 9986 | 1          | 15265 | —                       | —        | —                       | —        |

\*AC (Allele Count); AN (Allele Number)

\*Reference group is women who have no mutations in the given gene.

† P-value from two-sided Fisher's exact test.

Supplementary Table 8. Associations between pathogenic mutations in predisposition genes and breast cancer risk among African American women under age 50 years and African American women aged 50 years and older

| Gene          | Age <50 years     |          | Age ≥50 years    |          |
|---------------|-------------------|----------|------------------|----------|
|               | OR (95% CI)*      | p-value† | OR (95% CI)*     | p-value† |
| <i>ATM</i>    | 1.40 (0.55-3.71)  | 0.49     | 2.23 (1.01-5.44) | 0.06     |
| <i>BARD1</i>  | 0.76 (0.09-6.63)  | 0.79     | 0.87 (0.24-3.05) | 0.83     |
| <i>BRCA1</i>  | —                 | —        | 9.23 (1.76-170)  | 0.03     |
| <i>BRCA2</i>  | 14.61 (5.25-60.8) | < 0.001  | 4.02 (1.97-9.06) | <0.001   |
| <i>BRIP1</i>  | 0.76 (0.09-6.63)  | 0.79     | 1.21 (0.30-5.17) | 0.78     |
| <i>CHEK2</i>  | 4.23 (1.02-28.6)  | 0.07     | 2.92 (0.95-10.8) | 0.08     |
| <i>FANCC</i>  | 3.87 (1.19-17.3)  | 0.04     | 1.21 (0.40-3.65) | 0.73     |
| <i>PALB2</i>  | 12.38 (2.42-226)  | 0.02     | 7.45 (2.90-25.3) | <0.001   |
| <i>RAD51C</i> | 5.85 (0.84-115)   | 0.12     | 1.38 (0.21-11.1) | 0.73     |
| <i>RAD51D</i> | 1.05 (0.17-8.30)  | 0.96     | —                | —        |
| <i>RECQL</i>  | 2.97 (0.62-21.2)  | 0.20     | 3.21 (0.90-15.0) | 0.09     |

\*Odd ratios adjusted for study design, age and first-degree family history of breast cancer.

Reference group is women who have no mutations in the given gene

† Two-sided p-value from logistic regression analysis

Supplementary Table 9. Frequency of pathogenic mutations in known or suspected breast cancer susceptibility genes and associations with breast cancer risk in African American women without a first-degree family history of breast cancer

| Gene          | Affected (N=4038)      |                        | Unaffected (N=4403)    |                         | Odds Ratio*<br>(95% CI) | p value† |
|---------------|------------------------|------------------------|------------------------|-------------------------|-------------------------|----------|
|               | Mutated Alleles<br>No. | Mutation<br>Frequency% | Mutated Alleles<br>No. | Mutation<br>Frequency % |                         |          |
| <i>ATM</i>    | 27                     | 0.67                   | 12                     | 0.27                    | 1.96 (0.98-4.14)        | 0.064    |
| <i>BARD1</i>  | 6                      | 0.15                   | 8                      | 0.18                    | 0.71 (0.22-2.14)        | 0.54     |
| <i>BRCA1</i>  | 43                     | 1.07                   | 0                      | 0                       | -                       | -        |
| <i>BRCA2</i>  | 69                     | 1.71                   | 9                      | 0.20                    | 8.03 (4.15-17.52)       | < 0.001  |
| <i>BRIP1</i>  | 7                      | 0.17                   | 5                      | 0.11                    | 1.32 (0.39-4.75)        | 0.66     |
| <i>CDH1</i>   | 2                      | 0.05                   | 2                      | 0.05                    | 1.01 (0.11-9.18)        | 0.99     |
| <i>CDKN2A</i> | 1                      | 0.03                   | 0                      | 0                       | -                       | -        |
| <i>CHEK2</i>  | 15                     | 0.37                   | 6                      | 0.14                    | 2.76 (1.07-7.99)        | 0.044    |
| <i>ERCC3</i>  | 13                     | 0.32                   | 9                      | 0.20                    | 2.26 (0.96-5.57)        | 0.065    |
| <i>FANCC</i>  | 17                     | 0.42                   | 8                      | 0.18                    | 2.29 (0.98-5.82)        | 0.065    |
| <i>FANCM</i>  | 11                     | 0.27                   | 8                      | 0.18                    | 1.61 (0.62-4.31)        | 0.33     |
| <i>MRE11A</i> | 2                      | 0.05                   | 3                      | 0.07                    | -                       | -        |
| <i>MSH6</i>   | 2                      | 0.05                   | 2                      | 0.05                    | 1.00 (0.11-9.17)        | 0.999    |
| <i>NBN</i>    | 6                      | 0.15                   | 8                      | 0.18                    | 0.72 (0.22-2.20)        | 0.56     |
| <i>NF1</i>    | 5                      | 0.12                   | 0                      | 0                       | -                       | -        |
| <i>PALB2</i>  | 34                     | 0.84                   | 4                      | 0.09                    | 8.39 (3.25-28.62)       | < 0.001  |
| <i>RAD51C</i> | 9                      | 0.22                   | 3                      | 0.07                    | 3.02 (0.87-13.91)       | 0.11     |
| <i>RAD51D</i> | 4                      | 0.10                   | 1                      | 0.02                    | 4.19 (0.56-85.60)       | 0.22     |
| <i>RECQL</i>  | 14                     | 0.35                   | 5                      | 0.11                    | 2.91 (1.08-9.20)        | 0.046    |
| <i>TP53</i>   | 3                      | 0.07                   | 1                      | 0.02                    | -                       | -        |
| Total         | 290                    | 7.2                    | 95                     | 2.2                     |                         |          |

\* Adjusted for study design and age. Reference group is women who have no mutations in the given gene.

† Two-sided p-value from logistic regression analysis

Supplementary Table 10. Frequency of pathogenic mutations in known or suspected breast cancer susceptibility genes and associations with breast cancer risk in African American women with a first-degree family history of breast cancer

| Gene          | Affected (N=1049)      |                         | Unaffected (N=700)     |                         | Odds ratio*<br>(95% CI) | p value |
|---------------|------------------------|-------------------------|------------------------|-------------------------|-------------------------|---------|
|               | Mutated alleles<br>No. | Mutation frequency<br>% | Mutated alleles<br>No. | Mutation frequency<br>% |                         |         |
| <i>ATM</i>    | 13                     | 1.24                    | 4                      | 0.57                    | 2.11 (0.72-7.65)        | 0.204   |
| <i>BARD1</i>  | 1                      | 0.10                    | 0                      | 0.16                    | -                       | -       |
| <i>BRCA1</i>  | 42                     | 4.00                    | 3                      | 0.43                    | 9.02 (3.21-37.76)       | < 0.001 |
| <i>BRCA2</i>  | 36                     | 3.43                    | 3                      | 0.43                    | 7.97 (2.83-33.30)       | < 0.001 |
| <i>BRIP1</i>  | 3                      | 0.29                    | 1                      | 0.14                    | 1.96 (0.24-40.34)       | 0.564   |
| <i>CDH1</i>   | 2                      | 0.19                    | 0                      | 0                       | -                       | -       |
| <i>CHEK2</i>  | 4                      | 0.38                    | 0                      | 0                       | -                       | -       |
| <i>ERCC3</i>  | 1                      | 0.10                    | 2                      | 0.29                    | 0.26 (0.01-2.89)        | 0.286   |
| <i>FANCC</i>  | 3                      | 0.29                    | 2                      | 0.29                    | 1.40 (0.22-11.1)        | 0.718   |
| <i>FANCM</i>  | 2                      | 0.19                    | 3                      | 0.43                    | 0.40 (0.05-2.52)        | 0.326   |
| <i>MSH6</i>   | 2                      | 0.19                    | 1                      | 0.14                    | 1.31 (0.12-28.6)        | 0.828   |
| <i>NBN</i>    | 2                      | 0.19                    | 2                      | 0.29                    | 0.54 (0.06-4.64)        | 0.545   |
| <i>NF1</i>    | 1                      | 0.10                    | 1                      | 0.14                    | 1.10 (0.04-28.1)        | 0.949   |
| <i>PALB2</i>  | 22                     | 2.10                    | 1                      | 0.14                    | 13.55 (2.81-243)        | 0.011   |
| <i>RAD51D</i> | 4                      | 0.38                    | 1                      | 0.14                    | 2.26 (0.33-44.7)        | 0.471   |
| <i>RECQL</i>  | 14                     | 0.30                    | 5                      | 0.10                    | 3.19 (1.22-9.90)        | 0.027   |
| <i>TP53</i>   | 2                      | 0.19                    | 0                      | 0                       | -                       | -       |
| Total         | 154                    | 14.7                    | 29                     | 4.1                     |                         |         |

\* ORs adjusted for study design and age. Reference group is women who have no mutations in the given gene.

† Two-sided p-value from logistic regression analysis

Supplementary Table 11. Prevalence of pathogenic mutations in African American women with breast cancer according to age at diagnosis and first-degree family history of breast cancer

| Age at breast cancer diagnosis (years)                                                                                |            |           |           |            |           |           |            |           |           |            |           |           |
|-----------------------------------------------------------------------------------------------------------------------|------------|-----------|-----------|------------|-----------|-----------|------------|-----------|-----------|------------|-----------|-----------|
|                                                                                                                       | ≤40        |           |           | 41-50      |           |           | 51-60      |           |           | >60        |           |           |
|                                                                                                                       | Cases<br>N | Mut.<br>N | Mut.<br>% |
| <b>BRCA1 mutations</b>                                                                                                |            |           |           |            |           |           |            |           |           |            |           |           |
| All breast cancer                                                                                                     |            |           |           |            |           |           |            |           |           |            |           |           |
| Famhx-No                                                                                                              | 505        | 18        | 3.6%      | 1131       | 18        | 1.6%      | 1162       | 6         | 0.5%      | 1229       | 1         | 0.08%     |
| Famhx-Yes                                                                                                             | 75         | 17        | 22.7%     | 263        | 17        | 6.5%      | 322        | 6         | 1.8%      | 384        | 2         | 0.5%      |
| Overall                                                                                                               | 607        | 38        | 6.3%      | 1440       | 25        | 2.5%      | 1510       | 13        | 0.8%      | 1633       | 3         | 0.02%     |
| Estrogen receptor negative breast cancer                                                                              |            |           |           |            |           |           |            |           |           |            |           |           |
| Famhx-No                                                                                                              | 157        | 14        | 8.9%      | 327        | 13        | 4.0%      | 323        | 3         | 0.9%      | 266        | 1         | 0.4%      |
| Famhx-Yes                                                                                                             | 26         | 14        | 53.8%     | 79         | 10        | 12.7%     | 78         | 6         | 7.7%      | 71         | 2         | 2.8%      |
| Overall                                                                                                               | 194        | 30        | 15.5%     | 423        | 24        | 5.6%      | 409        | 10        | 2.4%      | 342        | 3         | 0.9%      |
| Estrogen receptor positive breast cancer                                                                              |            |           |           |            |           |           |            |           |           |            |           |           |
| Famhx-No                                                                                                              | 277        | 4         | 1.4%      | 667        | 4         | 0.3%      | 691        | 3         | 0.4%      | 773        | 0         | 0.0%      |
| Famhx-Yes                                                                                                             | 44         | 3         | 6.8%      | 151        | 5         | 3.3%      | 201        | 0         | 0.0%      | 257        | 0         | 0.0%      |
| Overall                                                                                                               | 337        | 8         | 2.4%      | 846        | 9         | 1.1%      | 908        | 3         | 0.3%      | 1039       | 0         | 0.0%      |
| <b>BRCA2 mutations</b>                                                                                                |            |           |           |            |           |           |            |           |           |            |           |           |
| All breast cancer                                                                                                     |            |           |           |            |           |           |            |           |           |            |           |           |
| Famhx-No                                                                                                              | 505        | 21        | 4.2%      | 1131       | 29        | 2.6%      | 1162       | 15        | 1.3%      | 1229       | 4         | 0.3%      |
| Famhx-Yes                                                                                                             | 75         | 2         | 2.7%      | 263        | 10        | 4.6%      | 322        | 7         | 3.7%      | 384        | 7         | 2.3%      |
| Overall                                                                                                               | 607        | 25        | 4.1%      | 1440       | 41        | 2.9%      | 1510       | 27        | 1.8%      | 1633       | 13        | 0.8%      |
| Estrogen receptor negative breast cancer                                                                              |            |           |           |            |           |           |            |           |           |            |           |           |
| Famhx-No                                                                                                              | 157        | 6         | 3.8%      | 327        | 8         | 2.4%      | 323        | 7         | 2.2%      | 266        | 1         | 0.4%      |
| Famhx-Yes                                                                                                             | 26         | 1         | 3.9%      | 79         | 1         | 1.3%      | 78         | 1         | 1.3%      | 71         | 5         | 7.0%      |
| Overall                                                                                                               | 194        | 7         | 3.6%      | 423        | 9         | 2.1%      | 409        | 8         | 2.0%      | 342        | 7         | 2.1%      |
| Estrogen receptor positive breast cancer                                                                              |            |           |           |            |           |           |            |           |           |            |           |           |
| Famhx-No                                                                                                              | 277        | 14        | 5.1%      | 667        | 18        | 2.7%      | 691        | 6         | 0.9%      | 773        | 2         | 0.2%      |
| Famhx-Yes                                                                                                             | 44         | 1         | 2.3%      | 151        | 8         | 5.3%      | 201        | 11        | 5.5%      | 257        | 3         | 1.2%      |
| Overall                                                                                                               | 337        | 17        | 5.0%      | 846        | 26        | 3.1%      | 908        | 17        | 1.9%      | 1039       | 5         | 0.5%      |
| Mutations in any of 12 genes ( <i>ATM, BARD1, BRCA1, BRCA2, CDH1, CHEK2, NF1, PALB2, PTEN, RAD51C, RAD51D, TP53</i> ) |            |           |           |            |           |           |            |           |           |            |           |           |
| All breast cancer                                                                                                     |            |           |           |            |           |           |            |           |           |            |           |           |
| Famhx-No                                                                                                              | 505        | 52        | 10.3%     | 1131       | 75        | 6.6%      | 1162       | 56        | 4.8%      | 1229       | 31        | 2.5%      |
| Famhx-Yes                                                                                                             | 75         | 22        | 30.7%     | 263        | 29        | 14.4%     | 322        | 25        | 10.2%     | 384        | 23        | 7.3%      |
| Overall                                                                                                               | 607        | 80        | 13.2%     | 1440       | 115       | 8.0%      | 1510       | 90        | 6.0%      | 1633       | 60        | 3.7%      |
| Estrogen receptor negative breast cancer                                                                              |            |           |           |            |           |           |            |           |           |            |           |           |
| Famhx-No                                                                                                              | 157        | 24        | 15.3%     | 327        | 30        | 9.2%      | 323        | 20        | 6.2%      | 266        | 10        | 3.8%      |
| Famhx-Yes                                                                                                             | 26         | 16        | 61.5%     | 79         | 14        | 17.7%     | 78         | 13        | 16.7%     | 71         | 15        | 21.1%     |
| Overall                                                                                                               | 194        | 42        | 21.6%     | 423        | 45        | 10.6%     | 409        | 34        | 8.3%      | 342        | 25        | 7.3%      |
| Estrogen receptor positive breast cancer                                                                              |            |           |           |            |           |           |            |           |           |            |           |           |
| Famhx-No                                                                                                              | 277        | 24        | 8.7%      | 667        | 37        | 5.5%      | 691        | 30        | 4.3%      | 773        | 17        | 2.2%      |
| Famhx-Yes                                                                                                             | 44         | 7         | 15.9%     | 151        | 17        | 11.3%     | 201        | 19        | 9.5%      | 257        | 10        | 3.9%      |
| Overall                                                                                                               | 337        | 34        | 10.1%     | 846        | 55        | 6.5%      | 908        | 49        | 5.4%      | 1039       | 28        | 2.7%      |

Supplementary Table 12. Age at diagnosis and tumor characteristics in African American women with breast cancer in CARRIERS population-based studies and SEER18 data, 2010-2016

|                             | CARRIERS (N=3916) | SEER (N=75899) |
|-----------------------------|-------------------|----------------|
| Age at diagnosis (years)    |                   |                |
| Mean (SD)                   | 56.4 (12.1)       | 59.6 (13.2)    |
| Range                       | 22 - 91           | 16 - 108       |
| Age category (years) (%)    |                   |                |
| Missing                     | 16                | 0              |
| <40                         | 373 (9.6)         | 5279 (7.0)     |
| 40-49                       | 910 (23.3)        | 14451 (19.0)   |
| 50-59                       | 1167 (29.9)       | 20679 (27.2)   |
| 60-69                       | 918 (23.5)        | 19483 (25.7)   |
| ≥70                         | 532 (13.6)        | 16007 (21.1)   |
| Behavior (%)                |                   |                |
| Missing                     | 299               | 0              |
| Invasive                    | 3009 (83.2)       | 61084 (80.5)   |
| in situ                     | 608 (16.8)        | 14815 (19.5)   |
| Hormone receptor status (%) |                   |                |
| Missing                     | 620               | 17940          |
| negative                    | 861 (26.1)        | 14476 (25.0)   |
| positive                    | 2435 (73.9)       | 43483 (75.0)   |
| HER2 status (%)             |                   |                |
| Missing                     | 1651              | 17940          |
| negative                    | 1828 (80.7)       | 47644 (82.2)   |
| positive                    | 437 (19.3)        | 10315 (17.8)   |

## REFERENCES

1. Palmer JR, Ruiz-Narvaez EA, Rotimi CN, *et al.* Genetic susceptibility loci for subtypes of breast cancer in an African American population. *Cancer Epidemiol Biomarkers Prev* 2013;22(1):127-34.
2. Rosenberg L, Adams-Campbell L, Palmer JR. The Black Women's Health Study: a follow-up study for causes and preventions of illness. *J Am Med Womens Assoc* (1972) 1995;50(2):56-8.
3. Calle EE, Rodriguez C, Jacobs EJ, *et al.* The American Cancer Society Cancer Prevention Study II Nutrition Cohort: rationale, study design, and baseline characteristics. *Cancer* 2002;94(2):500-11.
4. Patel AV, Jacobs EJ, Dudas DM, *et al.* The American Cancer Society's Cancer Prevention Study 3 (CPS-3): Recruitment, study design, and baseline characteristics. *Cancer* 2017;123(11):2014-2024.
5. Bernstein L, Allen M, Anton-Culver H, *et al.* High breast cancer incidence rates among California teachers: results from the California Teachers Study (United States). *Cancer Causes Control* 2002;13(7):625-35.
6. Kolonel LN, Henderson BE, Hankin JH, *et al.* A multiethnic cohort in Hawaii and Los Angeles: baseline characteristics. *Am J Epidemiol* 2000;151(4):346-57.
7. Pal T, Bonner D, Cragun D, *et al.* A high frequency of BRCA mutations in young black women with breast cancer residing in Florida. *Cancer* 2015;121(23):4173-80.
8. John EM, Sangaramoorthy M, Koo J, *et al.* Enrollment and biospecimen collection in a multiethnic family cohort: the Northern California site of the Breast Cancer Family Registry. *Cancer Causes Control* 2019;30(4):395-408.
9. Anton-Culver H, Cohen PF, Gildea ME, *et al.* Characteristics of BRCA1 mutations in a population-based case series of breast and ovarian cancer. *Eur J Cancer* 2000;36(10):1200-8.
10. Ambrosone CB, Ciupak GL, Bandera EV, *et al.* Conducting Molecular Epidemiological Research in the Age of HIPAA: A Multi-Institutional Case-Control Study of Breast Cancer in African-American and European-American Women. *J Oncol* 2009;2009:871250.
11. Trentham-Dietz A, Sprague BL, Hampton JM, *et al.* Modification of breast cancer risk according to age and menopausal status: a combined analysis of five population-based case-control studies. *Breast Cancer Res Treat* 2014;145(1):165-75.
12. Sandler DP, Hodgson ME, Deming-Halverson SL, *et al.* The Sister Study Cohort: Baseline Methods and Participant Characteristics. *Environ Health Perspect* 2017;125(12):127003.
13. Gail MH, Brinton LA, Byar DP, *et al.* Projecting individualized probabilities of developing breast cancer for white females who are being examined annually. *J Natl Cancer Inst* 1989;81(24):1879-86.
14. Costantino JP, Gail MH, Pee D, *et al.* Validation studies for models projecting the risk of invasive and total breast cancer incidence. *J Natl Cancer Inst* 1999;91(18):1541-8.
15. Chatterjee N, Shi J, Garcia-Closas M. Developing and evaluating polygenic risk prediction models for stratified disease prevention. *Nat Rev Genet* 2016;17(7):392-406.
16. National Cancer Institute, DCCPS, Surveillance Research Program, *et al.* Surveillance, Epidemiology, and End Results (SEER) Program Research Data (1973-2014). In; April 2017 (Based on November 2016 Submission).
